# Supplementary material
Source: PubMed Central journal article supplement (PMC4737728)
Supplement: thnov06p0428s1.pdf [file thnov06p0428s1.pdf]

Supplementary Figure 1: Correlation between  $^{68}\text{Ga}$ -Pentixafor uptake ( $\text{SUV}_{\text{mean}}$ ;  $\text{SUV}_{\text{max}}$ ), histological assessment of CXCR4 (immune-reactive score, IRS) and proliferation (Ki-67) in GBM

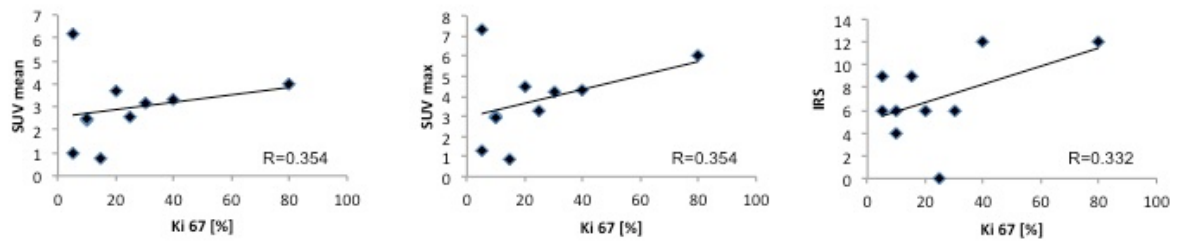

Dot plots of  $\text{SUV}_{\text{mean}}$  and  $\text{SUV}_{\text{max}}$  for  $^{68}\text{Ga}$ -Pentixafor, CXCR4 IRS and Ki-67 (n=10), respectively, demonstrating no significant correlation (Spearman's rho correlation coefficients:  $R=0.354$  ( $R^2=0.125$ ;  $p=0.316$ ) for both  $\text{SUV}_{\text{max}}$  and  $\text{SUV}_{\text{mean}}$ , and  $R=0.332$  ( $R^2=0.11$ ;  $p=0.348$ ) for CXCR4 IRS).
